# Supplementary material for: Antibiotic Expenditures by Medication, Class, and Healthcare Setting in the United States, 2010–2015
Source: Oxford University Press journal article supplement (doi:10.1093/cid/cix773), 2017-08-24
Supplement: cix773_suppl_supplemental_table_2.docx [file cix773_suppl_supplemental_table_2.docx]

**Supplemental Table 2. Health Care Setting Expenditures Stratified by Antibiotic Class, 2010-2015*** (expenditures are presented in millions)

|  | Community Pharmacies  $** (%) | Mail Service Pharmacies  $** (%) | Non-federal Hospitals  $** (%) | Other Non-Retail  $** (%) | Clinics  $** (%) |
| --- | --- | --- | --- | --- | --- |
| Tetracyclines | 9.7  (33.9) | 0.44  (23.4) | 0.78  (4.8) | 0.62  (9.6) | 0.17  (6.6) |
| Cephalosporins | 3.7  (12.8) | 0.02 (1.0) | 1.4  (8.5) | 0.49  (7.7) | 0.34  (13.6) |
| Macrolides | 3.9  (13.6) | 0.09  (4.8) | 0.82  (5.0) | 0.35  (5.5) | 0.21  (8.1) |
| Penicillins | 3.6  (12.5) | 0.07  (3.6) | 4.1  (24.9) | 1.0  (15.9) | 0.37  (14.5) |
| Aminoglycosides | 0.54  (1.9) | 1.0  (54.7) | 0.31  (1.9) | 0.19  (2.9) | 0.09  (3.5) |
| Quinolones | 3.6  (12.7) | 0.03  (1.7) | 0.85  (5.2) | 0.46  (7.1) | 0.11  (4.5) |
| Sulfonamides | 0.37  (1.3) | 0.01  (0.5) | 0.05  (0.3) | 0.05  (0.7) | 0.02  (0.8) |
| Oxazolidinones | 1.4  (4.9) | 0.03  (1.8) | 2.0  (12.2) | 0.62  (9.6) | 0.17  (6.5) |
| Miscellaneous | 1.8  (6.4) | 0.16  (8.5) | 6.1  (37.3) | 2.7  (41.0) | 1.1  (41.8) |

*Denominator=total $ in the respective health care setting (columns sum to ~100%)

**Results are reported in $1,000,000s
