# Supplementary material for: Antibiotic Expenditures by Medication, Class, and Healthcare Setting in the United States, 2010–2015
Source: Oxford University Press journal article supplement (doi:10.1093/cid/cix773), 2017-08-24
Supplement: cix773_suppl_supplemental_table_4.docx [file cix773_suppl_supplemental_table_4.docx]

**Supplemental Table 4. Top 10 Antibiotic Agents by Expenditures in the Community, 2010-2015** (expenditures are presented in millions).

| Antibiotic | 2010  $* (%) | 2011  $* (%) | 2012  $* (%) | 2013  $* (%) | 2014  $* (%) | 2015  $* (%) | Total Expenditures  $* (%) | P value** |
| --- | --- | --- | --- | --- | --- | --- | --- | --- |
| **Community Pharmacies** |  |  |  |  |  |  |  |  |
| Doxycycline | 0.73 (12.5) | 0.70 (13.1) | 0.79 (17.8) | 1.7 (33.7) | 1.2 (44.3) | 0.99 (41.0) | 6.1  (21.3) | 0.1644 |
| Minocycline | 0.76 (13.0) | 0.86 (15.9) | 0.64 (14.5) | 0.50 (10.1) | 0.39 (14.1) | 0.29 (12.0) | 3.4  (12.0) | 0.4480 |
| Levofloxacin | 1.3 (21.9) | 0.70 (13.0) | 0.04 (0.82) | 0.04 (0.89) | 0.03 (1.2) | 0.04 (1.3) | 2.1  (7.5) | 0.0416 |
| Amoxicillin/ clavulanic acid | 0.45 (7.7) | 0.41 (7.7) | 0.33 (7.5) | 0.31 (6.3) | 0.44 (16.2) | 0.26 (10.9) | 2.2  (7.8) | 0.2213 |
| Azithromycin | 0.44 (7.6) | 0.39 (7.4) | 0.31 (7.0) | 0.28 (5.7) | 0.29 (10.6) | 0.29 (11.9) | 2.0  (7.0) | 0.1426 |
| Cefdinir | 0.21 (3.5) | 0.21 (3.9) | 0.25 (5.6) | 0.31 (6.3) | 0.19 (7.1) | 0.15 (6.3) | 1.3  (4.6) | 0.0143 |
| Linezolid | 0.22 (3.7) | 0.23 (4.3) | 0.23 (5.2) | 0.24 (4.9) | 0.24 (8.9) | 0.23 (9.4) | 1.4  (4.8) | 0.0101 |
| Moxifloxacin | 0.34 (5.7) | 0.31 (5.7) | 0.21 (4.7) | 0.17 (3.4) | 0.04 (1.6) | 0.03 (1.1) | 1.1  (3.8) | 0.0012 |
| Vancomycin | 0.21 (3.6) | 0.26 (4.9) | 0.29 (6.7) | 0.19 (3.9) | 0.11 (4.1) | 0.10 (3.9) | 1.2  (4.1) | 0.7460 |
| Amoxicillin | 0.21 (3.6) | 0.20 (3.7) | 0.17 (3.9) | 0.16 (3.3) | 0.15 (5.3) | 0.14 (5.9) | 1.0  (3.6) | 0.0586 |
| **Clinics** |  |  |  |  |  |  |  |  |
| Daptomycin | 0.04 (12.7) | 0.04 (17.1) | 0.05 (17.6) | 0.05 (13.9) | 0.18 (31.6) | 0.22 (31.6) | 0.59  (23.4) | 0.1159 |
| Linezolid | 0.02 (6.0) | 0.02 (6.1) | 0.02 (6.9) | 0.03 (7.3) | 0.04 (6.1) | 0.05 (6.6) | 0.16  (6.5) | 0.5018 |
| Ertapenem | 0.01 (4.5) | 0.01 (5.2) | 0.02 (7.1) | 0.03 (7.5) | 0.04 (6.2) | 0.04 (6.1) | 0.15  (6.1) | 0.2675 |
| Penicillin G | 0.02 (7.3) | 0.02 (7.1) | 0.02 (6.2) | 0.02 (5.3) | 0.03 (4.8) | 0.03 (5.0) | 0.12  (4.8) | 0.0032 |
| Vancomycin | 0.02 (6.0) | 0.02 (6.1) | 0.02 (6.1) | 0.02 (5.5) | 0.03 (4.7) | 0.05 (7.2) | 0.15  (6.0) | 0.8831 |
| Ceftriaxone | 0.02 (7.0) | 0.02 (6.3) | 0.02 (6.5) | 0.02 (5.0) | 0.02 (3.5) | 0.02 (3.2) | 0.12  (4.7) | 0.0029 |
| Doxycycline | 0.007 (2.4) | 0.007 (2.5) | 0.008 (2.8) | 0.03 (7.2) | 0.03 (4.6) | 0.02 (2.8) | 0.10  (3.8) | 0.4837 |
| Piperacillin/ tazobactam | 0.01 (3.8) | 0.01 (3.3) | 0.008 (2.6) | 0.01 (3.2) | 0.02 (4.0) | 0.02 (2.3) | 0.08  (3.1) | 0.4465 |
| Levofloxacin | 0.02 (8.6) | 0.02 (5.4) | 0.005 (1.9) | 0.007 (1.9) | 0.009 (1.6) | 0.009(1.3) | 0.07  (2.8) | 0.0238 |
| Tobramycin | 0.007 (2.5) | 0.007 (2.4) | 0.009 (3.0) | 0.01 (3.7) | 0.02 (2.7) | 0.01 (1.8) | 0.07  (2.6) | 0.7628 |
| **Mail Service Pharmacies** |  |  |  |  |  |  |  |  |
| Tobramycin | 0.09 (40.4) | 0.10 (43.4) | 0.13 (54.0) | 0.26 (67.3) | 0.24 (66.9) | 0.19 (36.8) | 1.0  (54.5) | 0.6154 |
| Doxycycline | 0.05 (20.6) | 0.05 (19.6) | 0.04 (14.8) | 0.05 (12.9) | 0.07 (18.7) | 0.07 (14.0) | 0.32  (17.1) | 0.1913 |
| Minocycline | 0.02 (8.8) | 0.02 (8.8) | 0.02 (6.6) | 0.02 (4.0) | 0.02 (4.7) | 0.01 (2.8) | 0.10  (5.6) | 0.0038 |
| Atovaquone | 0.01 (6.5) | 0.01 (6.2) | 0.02 (6.2) | 0.01 (3.7) | 0.006 (1.6) | 0.008 (1.5) | 0.07  (3.9) | 0.0052 |
| Vancomycin | 0.01 (4.4) | 0.01 (4.5) | 0.006 (2.5) | 0.003 (0.84) | 0.005 (1.3) | 0.004 (0.78) | 0.04  (2.1) | 0.0104 |
| Azithromycin | 0.005 (2.3) | 0.006 (2.4) | 0.006 (2.4) | 0.005 (1.3) | 0.004 (1.2) | 0.005 (0.9) | 0.03  (1.7) | 0.0125 |
| Linezolid | 0.005 (2.2) | 0.004 (1.7) | 0.004 (1.8) | 0.006 (1.5) | 0.004 (1.2) | 0.004 (0.7) | 0.03  (1.5) | 0.0027 |
| Erythromycin | 0.001 (0.25) | 0.002 (0.86) | 0.004 (1.6) | 0.005 (1.3) | 0.007 (2.0) | 0.009 (1.8) | 0.03  (1.5) | 0.0172 |
| Aztreonam | 0.001 (0.58) | 0.003 (1.4) | 0.004 (1.5) | 0.004 (1.1) | 0.005 (1.5) | 0.03 (6.3) | 0.05  (2.7) | 0.1039 |
| Levofloxacin | 0.009 (3.9) | 0.006 (2.3) | 0.001 (0.29) | 0.001 (0.16) | 0.001 (0.23) | 0.001 (0.11) | 0.02  (0.92) | 0.0305 |

*Results are reported in $1,000,000s

**P value is evaluating the trend in the proportion of expenditures over five years
